# Supplementary material for: Mass spectrometry sequencing of transfer ribonucleic acids by the comparative analysis of RNA digests (CARD) approach
Source: Royal Society of Chemistry journal article supplement (doi:10.1039/c2an36515d), 2013-01-01
Supplement: c2an36515d.pdf [file c2an36515d.pdf]

## Supplemental Data and Information for:

### Mass Spectrometry Sequencing of Transfer Ribonucleic Acids by the Comparative Analysis of RNA Digests (CARD) Approach

Siwei Li and Patrick A. Limbach\*

Rieveschl Laboratories for Mass Spectrometry, Department of Chemistry, PO Box 210172, University of Cincinnati, Cincinnati, OH 45221-0172

\*To whom correspondence should be addressed.

Phone (513) 556-1871

Fax (513) 556-9239

email [Pat.Limbach@uc.edu](mailto:Pat.Limbach@uc.edu)

**Supplemental Table S1.** Basic Local Alignment Search Tool (BLAST) results for searching 14 randomly chosen *E. coli* tRNA genes against the *C. koseri* genome. The value reported is the %sequence homology between the *E. coli* gene and that found in *C. koseri*.

| <b><i>E. coli</i> query sequence:</b> | <b>tRNA ID</b> | <b><i>E. coli</i></b> | <b><i>C. koseri</i></b> |
|---------------------------------------|----------------|-----------------------|-------------------------|
| tRNA: Alanine 1 (Ala1) [A]            | DA1660         | 100%                  | 100%                    |
| tRNA: Cysteine (Cys) [C]              | DC1660         | 100%                  | 98%                     |
| tRNA: Glutamic Acid 1 (Glu1) [E]      | DE1660         | 100%                  | 100%                    |
| tRNA: Phenylalanine (Phe) [F]         | DF1660         | 100%                  | 100%                    |
| tRNA: Glycine 1 (Gly1) [G]            | DG1660         | 100%                  | 100%                    |
| tRNA: Histidine (His) [H]             | DH1660         | 100%                  | 100%                    |
| tRNA: Isoleucine 1 (Ile1) [I]         | DI1660         | 100%                  | 100%                    |
| tRNA: Leucine 1 (Leu1) [L]            | DL1660         | 100%                  | 100%                    |
| tRNA: Methionine (Met) [M]            | DM1660         | 100%                  | 100%                    |
| tRNA: Glutamine 1 (Gln1) [Q]          | DQ1660         | 100%                  | 100%                    |
| tRNA: Arginine 1 (Arg1) [R]           | DR1660         | 100%                  | 98%                     |
| tRNA: Serine 1 (Ser1) [S]             | DS1664         | 100%                  | 100%                    |
| tRNA: Threonine 1 (Thr1) [T]          | DT1660         | 100%                  | 97%                     |
| tRNA: Valine 1 (Val1) [V]             | DV1662         | 100%                  | 100%                    |

**Supplemental Table S2.** Excel file containing tRNA sequences for *E. coli* obtained from the tRNAdb 2009 database (<http://trnadb.bioinf.uni-leipzig.de/>)<sup>1</sup> aligned with the appropriate *C. koseri* tRNA genes obtained from the Genomic tRNA Database (<http://gtrnadb.ucsc.edu/>)<sup>2</sup> or from BLAST searches against the *C. koseri* genome (NC\_009792.1).<sup>3</sup> Aligned sequences are then compared as described in the text to yield anticipated singlets and doublets during comparative sequencing.

**Supplemental Table S3.** Excel file containing tRNA sequences for *E. coli* obtained from the tRNADB 2009 database (<http://trnadb.bioinf.uni-leipzig.de/>)<sup>1</sup> aligned with the appropriate *S. enterica* tRNA genes obtained from the Genomic tRNA Database (<http://gtrnadb.ucsc.edu/>).<sup>2</sup> Aligned sequences are then compared as described in the text to yield anticipated singlets and doublets during comparative sequencing.

**Supplemental Figure S1.** Extracted ion chromatograms corresponding to the anticipated doubly- and triply-charged ions of AC[s<sup>2</sup>C]U[mnm<sup>5</sup>U]CU[t<sup>6</sup>A]AGp, a singlet from tRNA-Arg(UCU), at 5 µg and 20 µg of *E. coli* total tRNA after RNase T1 digestion loaded on column. The XIC response at 31.5 min corresponds to a doubly-charged ion consistent with a base composition of C<sub>2</sub>U<sub>2</sub>A<sub>2</sub>Gp + methyl, which is not the anticipated singlet.

**Supplemental Figure S2.** Mass spectrum corresponding to the anticipated singlet [DUGp] from *C. koseri* tRNA-Asp(GUC). A number of interfering ions, likely originating from the ubiquitous digestion products CCGp ( $m/z$  972.1), (CU)Gp ( $m/z$  973.1), and UUGp ( $m/z$  974.1), are present and can interfere with detection of the DUGp singlet.

**Supplemental Figure S3.** Mass spectra corresponding to the anticipated singlet CAAAGp ( $m/z$  827.5, 2- charge) when (a) *C. koseri* is labeled with <sup>18</sup>O and (b) *E. coli* is labeled with <sup>18</sup>O. Although the isotopic envelope shifts by -1  $m/z$  unit when *C. koseri* is labeled with <sup>16</sup>O, interfering RNase T1 digestion products hinder unequivocal assignment of this singlet.

**Supplemental Figure S4.** (a) Collision-induced dissociation mass spectrum of the singlet U[s<sup>4</sup>U]AACAAAGp from *E. coli* total tRNAs. (b) Collision-induced dissociation mass spectrum of the doublet [m<sup>7</sup>G]UCCCCAGp from tRNA-Thr(GGU).

**Supplemental Figure S5.** Calculated codon usage frequencies for *E. coli*, *C. koseri* and *T. thermophilus*. Comparative sequencing is more effective when the codon usage frequencies of the reference and candidate organisms are similar.

## References

1. F. Juhling, M. Morl, R. K. Hartmann, M. Sprinzl, P. F. Stadler and J. Putz, *Nucleic Acids Res*, 2009, **37**, D159-162.
2. P. P. Chan and T. M. Lowe, *Nucleic Acids Res*, 2009, **37**, D93-97.
3. S. F. Altschul, W. Gish, W. Miller, E. W. Myers and D. J. Lipman, *J Mol Biol*, 1990, **215**, 403-410.

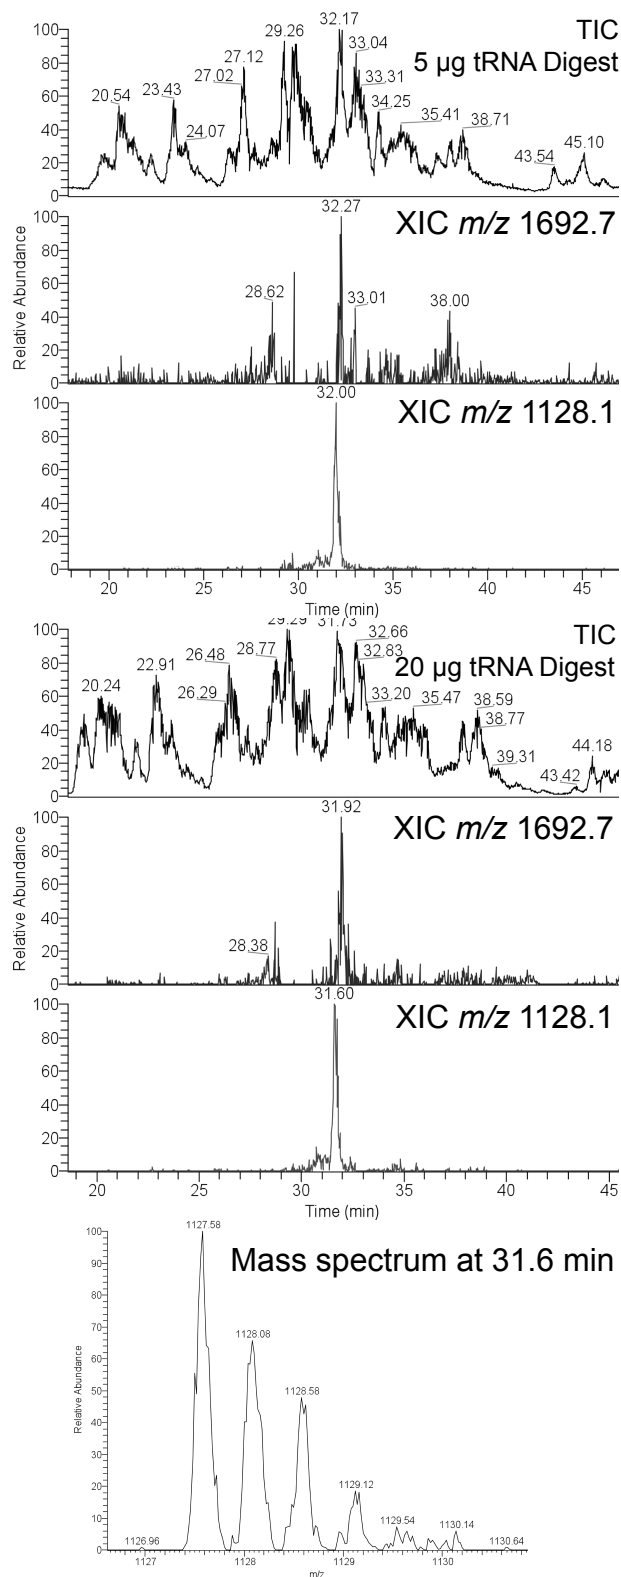

**Supplemental Figure S1.** Extracted ion chromatograms corresponding to the anticipated doubly- and triply-charged ions of AC[s<sup>2</sup>C]U[mnm<sup>5</sup>U]CU[t<sup>6</sup>A]AGp, a singlet from tRNA-Arg(UCU), at 5 µg and 20 µg of *E. coli* total tRNA after RNase T1 digestion loaded on column. The XIC response at 31.5 min corresponds to a doubly-charged ion consistent with a base composition of C<sub>2</sub>U<sub>2</sub>A<sub>2</sub>Gp + methyl, which is not the anticipated singlet.

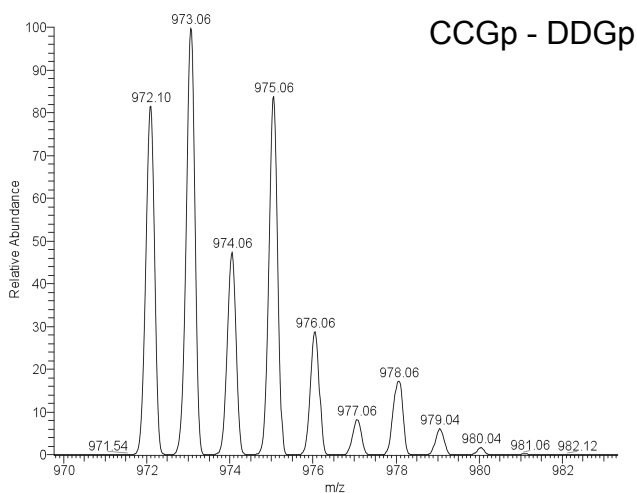

**Supplemental Figure S2.** Mass spectrum corresponding to the anticipated singlet [DUGp] from *C. koseri* tRNA-Asp(GUC). A number of interfering ions, likely originating from the ubiquitous digestion products CCGp ( $m/z$  972.1), (CU)Gp ( $m/z$  973.1), and UUGp ( $m/z$  974.1), are present and can interfere with detection of the DUGp singlet.

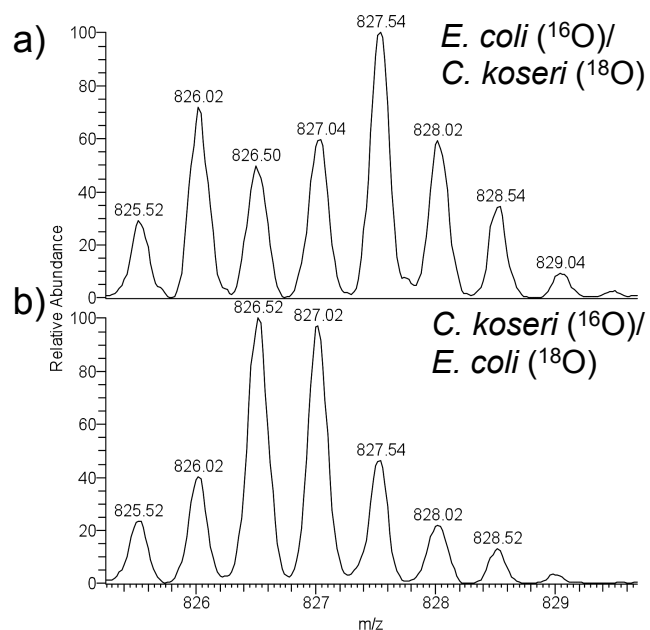

**Supplemental Figure S3.** Mass spectra corresponding to the anticipated singlet CAAAGp ( $m/z$  827.5, 2- charge) when (a) *C. koseri* is labeled with  $^{18}\text{O}$  and (b) *E. coli* is labeled with  $^{18}\text{O}$ . Although the isotopic envelope shifts by  $-1$   $m/z$  unit when *C. koseri* is labeled with  $^{16}\text{O}$ , interfering RNase T1 digestion products hinder unequivocal assignment of this singlet.

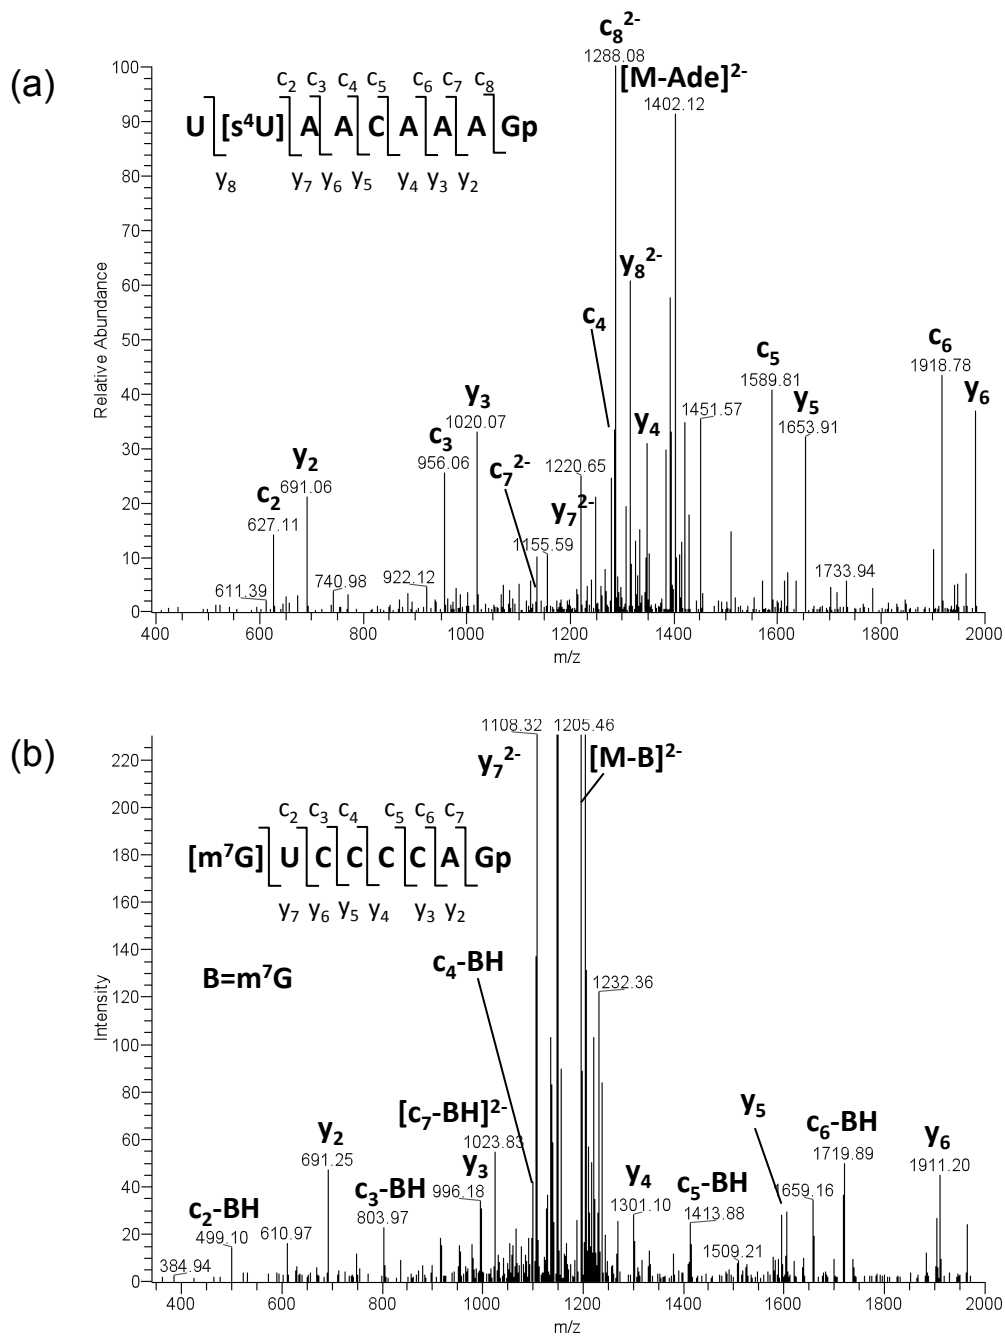

**Supplemental Figure S4.** (a) Collision-induced dissociation mass spectrum of the singlet U[s<sup>4</sup>U]AACAAAGp from *E. coli* total tRNAs. (b) Collision-induced dissociation mass spectrum of the doublet [m<sup>7</sup>G]UCCCCAGp.

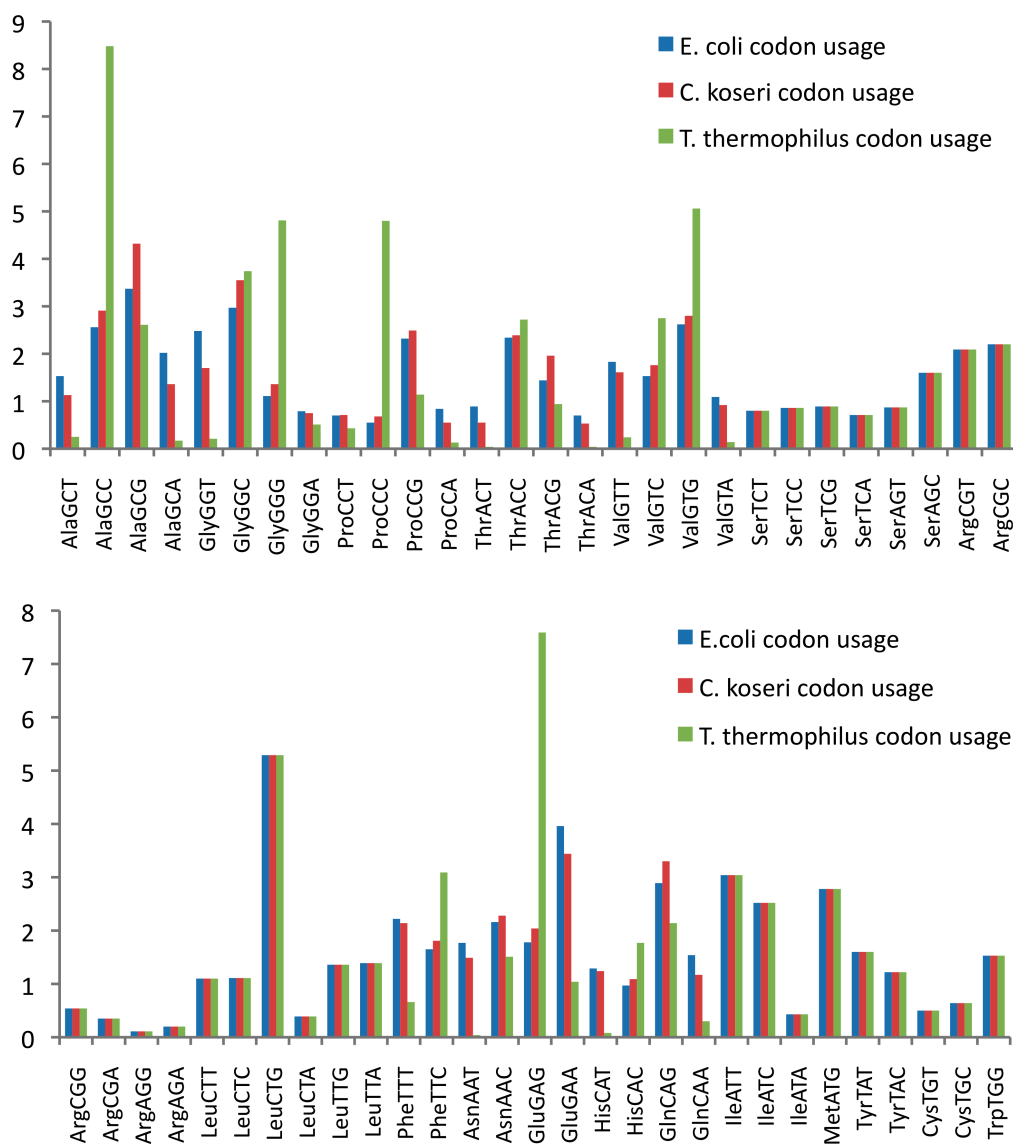

**Supplemental Figure S5.** Calculated codon usage frequencies for *E. coli*, *C. koseri* and *T. thermophilus*. Comparative sequencing is more effective when the codon usage frequencies of the reference and candidate organisms are similar.
